# Supplementary material for: Characterization of the pathogenesis and immune response to Listeria monocytogenes strains isolated from a sustained national outbreak
Source: PubMed Central journal article supplement (PMC6925182; doi:10.1038/s41598-019-56028-3), 2019-12-20
Supplement: 41598_2019_56028_MOESM1_ESM.pdf [file 41598_2019_56028_MOESM1_ESM.pdf]

**Supplementary Information to**

**Characterization of the pathogenesis and immune response to *Listeria monocytogenes* strains isolated from a sustained national outbreak**

Pallab Ghosh, Yan Zhou, Quentin Richardson and Darren E. Higgins

## Supplementary Figures

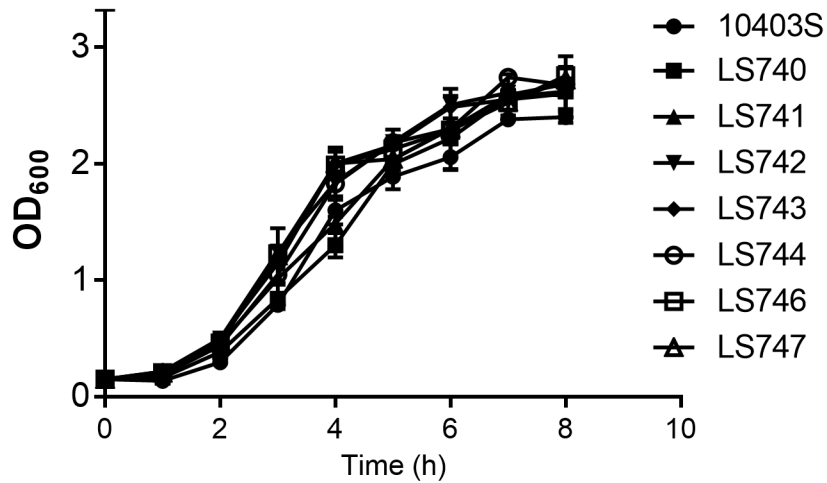

**Supplementary Figure S1.** *In vitro* growth of *L. monocytogenes* strains in BHI broth. Bacterial cultures were grown shaking at 37°C for 8 hours and the OD<sub>600</sub> was measured at 60-minute intervals. Data represents the mean  $\pm$ SD of three experiments.

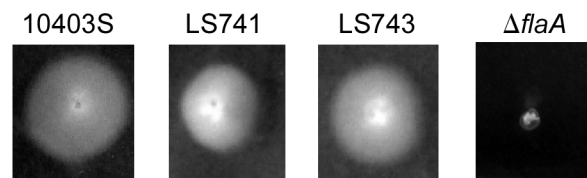

**Supplementary Figure S2.** Motility of *L. monocytogenes* strains. Flagellar motility of *L. monocytogenes* 10403S, LS741, LS743, and the flagellar motility-deficient EGDe  $\Delta$ *flaA* ( $\Delta$ *flaA*) strains are shown on 0.3% agar medium grown at 30°C for 16 hours. Images shown are representative of two separate experiments with similar results.

|                 |     |                                                               |     |
|-----------------|-----|---------------------------------------------------------------|-----|
| 10403S PrfA     | 1   | MNAQAEEFKKYLETNGIKPKQFHKKELIFNQWDPQEYCIFLYDGITKLTISENGTIMNL   | 60  |
| LS741 PrfA      | 1   | MNAQAEEFKKYLETNGIKPKQFHKKELIFNQWDPQEYCIFLYDGITKLTISENGTIMNL   | 60  |
| LS743 PrfA      | 1   | MNAQAEEFKKYLETNGIKPKQFHKKELIFNQWDPQEYCIFLYDGITKLTISENGTIMNL   | 60  |
| Seq. identities |     | MNAQAEEFKKYLETNGIKPKQFHKKELIFNQWDPQEYCIFLYDGITKLTISENGTIMNL   |     |
|                 |     |                                                               |     |
| 10403S PrfA     | 61  | QYYKGAFVIMSGFIDTETSVMGYNLEVISEQATAYVIKINELKELLSKNLTHFFYVFQTL  | 120 |
| LS741 PrfA      | 61  | QYYKGAFVIMSGFIDTETSVMGYNLEVISEQATAYVIKINELKELLSKNLTHFFYVFQTL  | 120 |
| LS743 PrfA      | 61  | QYYKGAFVIMSGFIDTETSVMGYNLEVISEQATAYVIKINELKELLSKNLTHFFYVFQTL  | 120 |
| Seq. identities |     | QYYKGAFVIMSGFIDTETSVMGYNLEVISEQATAYVIKINELKELLSKNLTHFFYVFQTL  |     |
|                 |     |                                                               |     |
| 10403S PrfA     | 121 | QKQVSYSLAKFNDFSINGKLGSI CGQLLILTYVYGKETPDGIKITLDNLTMQELGYSSGI | 180 |
| LS741 PrfA      | 121 | QKQVSYSLAKFNDFSINGKLGSI CGQLLILTYVYGKETPDGIKITLDNLTMQELGYSSGI | 180 |
| LS743 PrfA      | 121 | QKQVSYSLAKFNDFSINGKLGSI CGQLLILTYVYGKETPDGIKITLDNLTMQELGYSSGI | 180 |
| Seq. identities |     | QKQVSYSLAKFNDFSINGKLGSI CGQLLILTYVYGKETPDGIKITLDNLTMQELGYSSGI |     |
|                 |     |                                                               |     |
| 10403S PrfA     | 181 | AHSSAVSRIISKLKQEKVIVYKNSCFYVQNL DYLKRYAPKLEW FYLACPATWGKLN    | 237 |
| LS741 PrfA      | 181 | AHSSAVSRIISKLKQEKVIVYKNSCFYVQNL DYLKRYAPKLEW FYLACPATWGKLN    | 237 |
| LS743 PrfA      | 181 | AHSSAVSRIISKLKQEKVIVYKNSCFYVQNL DYLKRYAPKLEW FYLACPATWGKLN    | 237 |
| Seq. identities |     | AHSSAVSRIISKLKQEKVIVYKNSCFYVQNL DYLKRYAPKLEW FYLACPATWGKLN    |     |

**Supplementary Figure S3.** Protein sequence alignment of PrfA in *L. monocytogenes* strains 10403S, LS741 and LS743. The known PrfA\* mutations<sup>1,2</sup> do not appear in 10403S or the LS741 and LS743 outbreak strains.

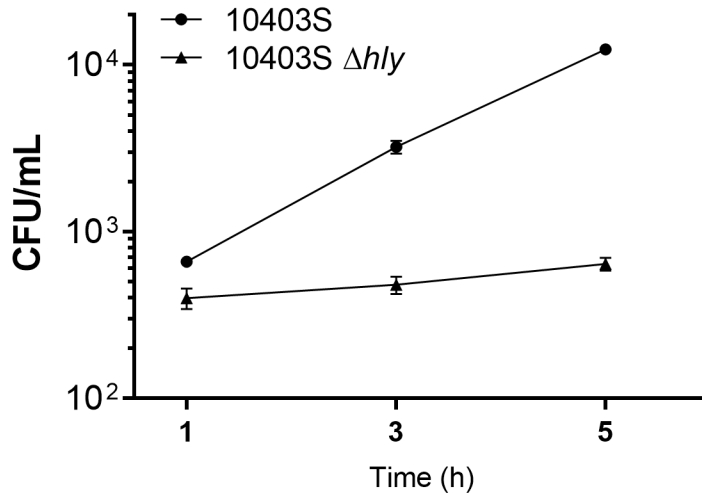

**Supplementary Figure S4.** Intracellular growth of *L. monocytogenes* in HeLa cells. HeLa cells were infected with the indicated strains for 1 hour. Gentamicin was then added and at 2-hour intervals post-infection, HeLa cells were lysed and intracellular bacteria were enumerated by plating dilutions of lysates. Data presented is the mean  $\pm$ SD of three independent experiments performed in duplicate.

**Supplementary Table S1.** Characteristics of the *L. monocytogenes* strains used in this study.

| Strain or isolate     | Alternative name | PFGE pattern <sup>#</sup> | ST <sup>**</sup> | Serotype | Outbreak associated              | Source                      | Reference(s) | Biosample or accession no.      |
|-----------------------|------------------|---------------------------|------------------|----------|----------------------------------|-----------------------------|--------------|---------------------------------|
| LS740                 | CFSAN012827      | II                        | NA               | 1/2b     | Yes, cantaloupe outbreak in 2011 | Human                       | 3            | SAMN02769788                    |
| LS741                 | CFSAN012828      | II                        | 5                | 1/2b     | Yes, cantaloupe outbreak in 2011 | Human                       | 3            | SAMN02769789, AAALMK000000000.1 |
| LS742                 | CFSAN012829      | I                         | NA               | 1/2a     | Yes, cantaloupe outbreak in 2011 | Human                       | 3            | SAMN02769790                    |
| LS743                 | CFSAN012830      | I                         | 29               | 1/2a     | Yes, cantaloupe outbreak in 2011 | Human                       | 3,4          | SAMN02769791, JRZB000000000.1   |
| LS744                 | CFSAN012831      | IV                        | NA               | 1/2a     | Yes, cantaloupe outbreak in 2011 | Human                       | 3            | SAMN02769792                    |
| LS746                 | CFSAN012832      | III                       | NA               | 1/2a     | Yes, cantaloupe outbreak in 2011 | Human                       | 3            | SAMN02769793                    |
| LS747                 | CFSAN012833      | IV                        | NA               | 1/2a     | Yes, cantaloupe outbreak in 2011 | Human                       | 3            | SAMN02769794                    |
| 10403S                | N/A              | N/A                       | 85               | 1/2a     | No                               | Human, lab reference strain | 5,6          | SAMN02641382, NC_017544         |
| 10403S<br><i>Δhly</i> | DP-L2161         | N/A                       | 85               | 1/2a     | N/A                              |                             | 7            | N/A                             |
| EGDe<br><i>ΔflaA</i>  | DH-L1042         | N/A                       | 35               | 1/2a     | N/A                              | Lab reference strain        | 8            | N/A                             |
| LS741<br><i>Δhly</i>  | DH-L2148         | II                        | 5                | 1/2b     | N/A                              |                             | This study   | N/A                             |

<sup>#</sup>Pulsed-field gel electrophoresis (PFGE) pattern combinations based on the restriction enzymes *AscI* and *ApaI* are reported as described<sup>3</sup>.

<sup>\*\*</sup>ST, sequence type based on a 7-gene multilocus sequence typing (MLST) comparison as observed in the Institut Pasteur *L. monocytogenes* MLST database (<https://bigsd.bpasteur.fr/listeria/listeria.html>).

NA: not analyzed

N/A: not applicable

## Supplementary Table S2. *Escherichia coli* strains and plasmids used in this study.

| Strain or plasmid  | Strain genotype or plasmid description                                   | Reference(s) |
|--------------------|--------------------------------------------------------------------------|--------------|
| pKSV7              | Allelic exchange vector for <i>L. monocytogenes</i>                      | 9            |
| pKSV7 $\Delta hly$ | Allelic exchange vector for the in-frame deletion of <i>hly</i> in LS741 | 7            |
| DP-E2154           | <i>E. coli</i> harboring pKSV7 $\Delta hly$                              | 7            |

## Supplementary References

- 1 Eiting, M., Hagelucken, G., Schubert, W. D. & Heinz, D. W. The mutation G145S in PrfA, a key virulence regulator of *Listeria monocytogenes*, increases DNA-binding affinity by stabilizing the HTH motif. *Mol. Microbiol.* **56**, 433-446 (2005).
- 2 Becavin, C. *et al.* Comparison of widely used *Listeria monocytogenes* strains EGD, 10403S, and EGD-e highlights genomic variations underlying differences in pathogenicity. *mBio* **5**, 10.1128/mBio.00969-00914 (2014).
- 3 Laksanalamai, P. *et al.* Genomic characterization of *Listeria monocytogenes* strains involved in a multistate listeriosis outbreak associated with cantaloupe in US. *PLoS One* **7**, e42448; 42410.41371/journal.pone.0042448 (2012).
- 4 Burall, L. S., Grim, C., Gopinath, G., Laksanalamai, P. & Datta, A. R. Whole-genome sequencing identifies an atypical *Listeria monocytogenes* strain isolated from pet foods. *Genome Announc.* **2**, e01243-01214; 01210.01128/genomeA.01243-01214 (2014).
- 5 Edman, D. C., Pollock, M. B. & Hall, E. R. *Listeria monocytogenes* L forms. I. Induction maintenance, and biological characteristics. *J. Bacteriol.* **96**, 352-357 (1968).
- 6 Bishop, D. K. & Hinrichs, D. J. Adoptive transfer of immunity to *Listeria monocytogenes*. The influence of *in vitro* stimulation on lymphocyte subset requirements. *J. Immunol.* **139**, 2005-2009 (1987).
- 7 Jones, S. & Portnoy, D. A. Characterization of *Listeria monocytogenes* pathogenesis in a strain expressing perfringolysin O in place of listeriolysin O. *Infect. Immun.* **62**, 5608-5613 (1994).
- 8 Gründling, A., Burrack, L. S., Bower, H. G. & Higgins, D. E. *Listeria monocytogenes* regulates flagellar motility gene expression through MogR, a transcriptional repressor required for virulence. *Proc. Natl. Acad. Sci. U.S.A.* **101**, 12318-12323 (2004).
- 9 Smith, K. & Youngman, P. Use of a new integrational vector to investigate compartment-specific expression of the *Bacillus subtilis* spoIIM gene. *Biochimie* **74**, 705-711 (1992).
